# Supplementary material for: Global miRNA expression analysis of serous and clear cell ovarian carcinomas identifies differentially expressed miRNAs including miR-200c-3p as a prognostic marker
Source: PubMed Central journal article supplement (PMC3928323; doi:10.1186/1471-2407-14-80), 2014-02-11

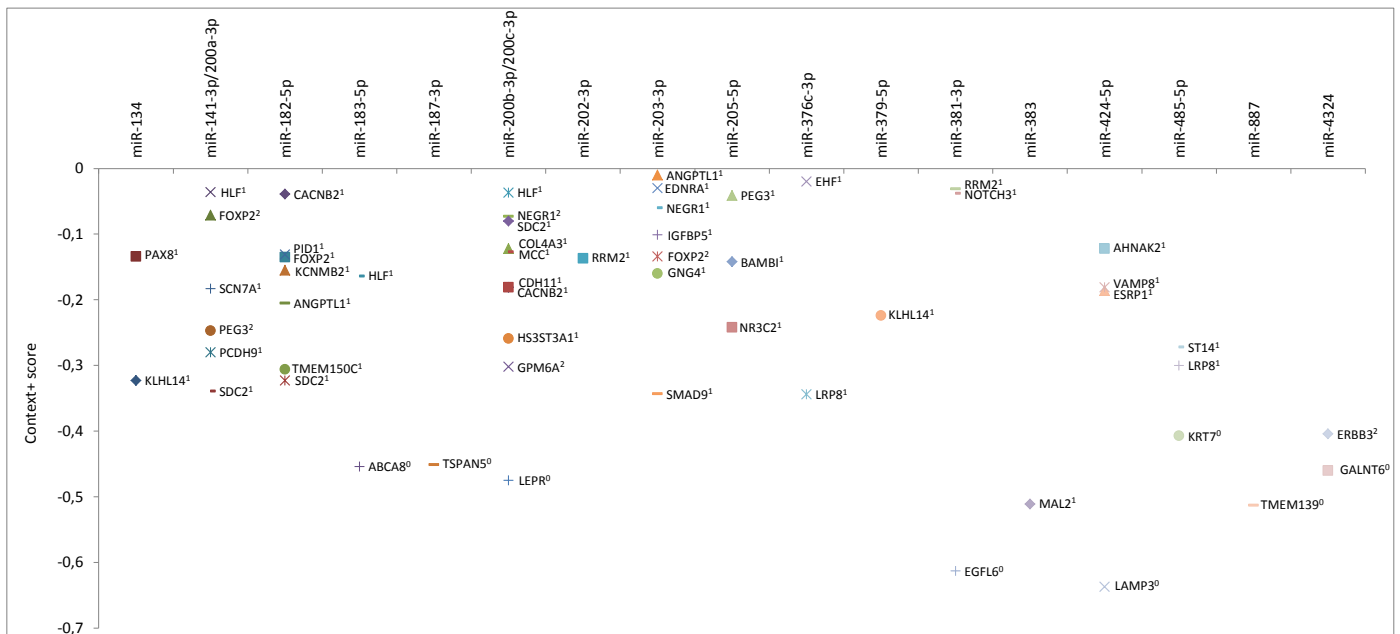

Supplement: 1471-2407-14-80-S3.pdf [file 1471-2407-14-80-S3.pdf]
